# Supplementary material for: Pressurized-Liquid Extraction as an Efficient Method for Valorization of Thymus serpyllum Herbal Dust towards Sustainable Production of Antioxidants
Source: MDPI journal article supplement (doi:10.3390/molecules26092548), 2021-04-27
Supplement: s1 [file s1]

Supplementary Material

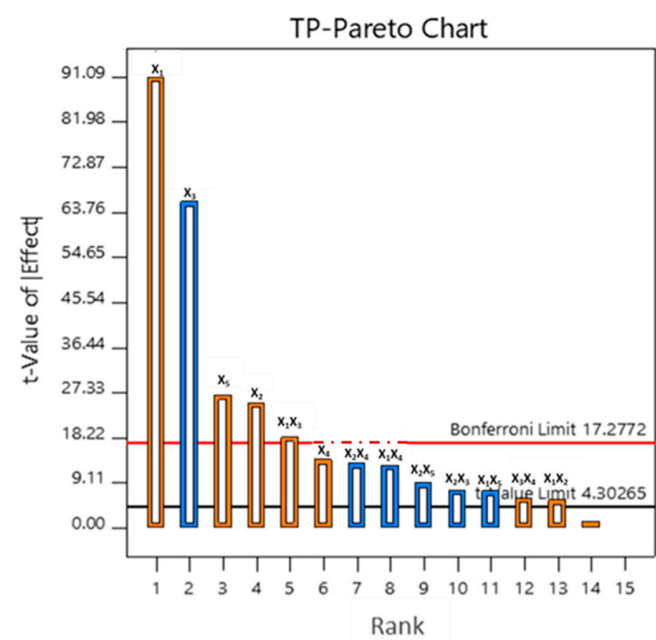

Figure S1. Pareto chart exhibiting effects of five PLE variables on TP

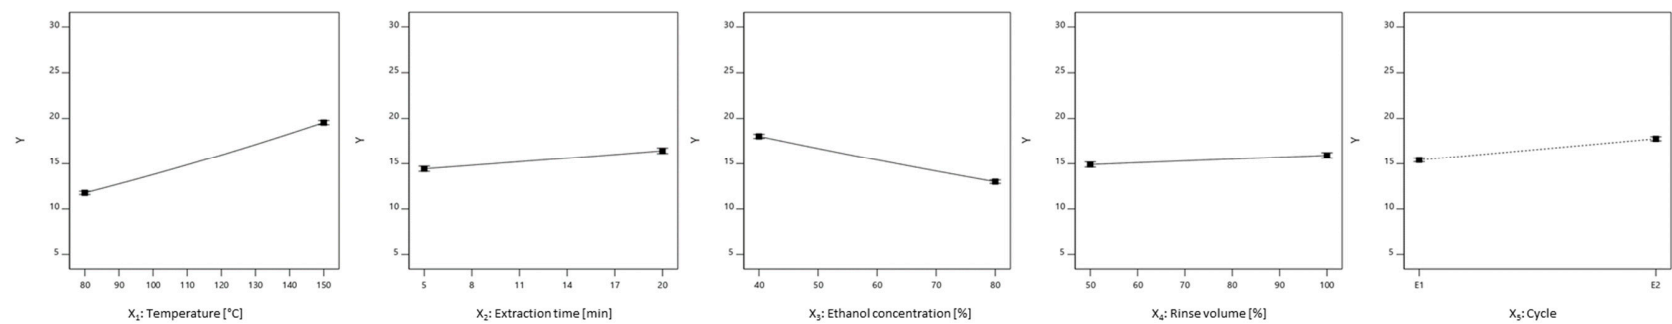

Figure S2. Influence of temperature, extraction time, ethanol concentration, rinse volume and number of cycles on Y

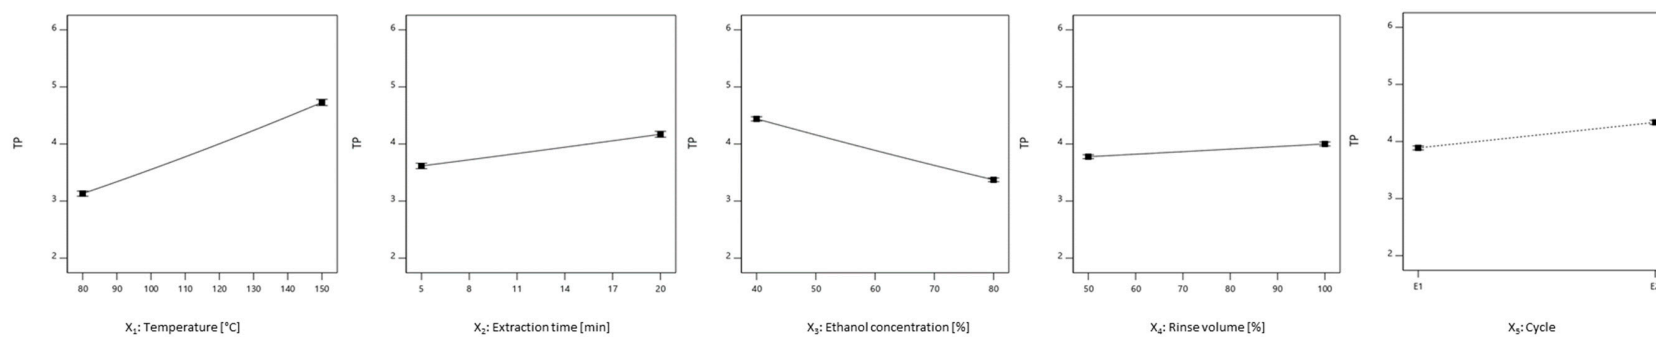

**Figure S3.** Influence of temperature, extraction time, ethanol concentration, rinse volume and number of cycles on TP

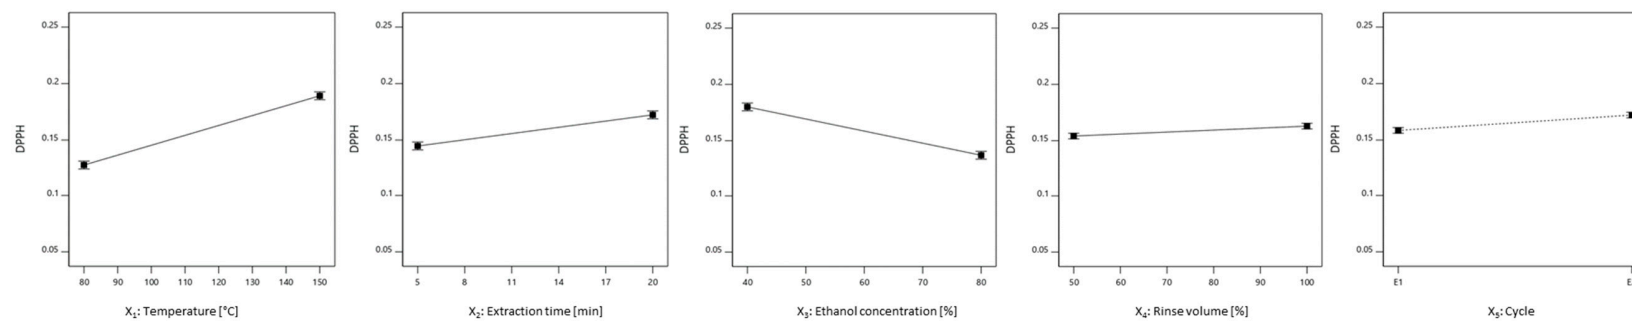

**Figure S4.** Influence of temperature, extraction time, ethanol concentration, rinse volume and number of cycles on DPPH

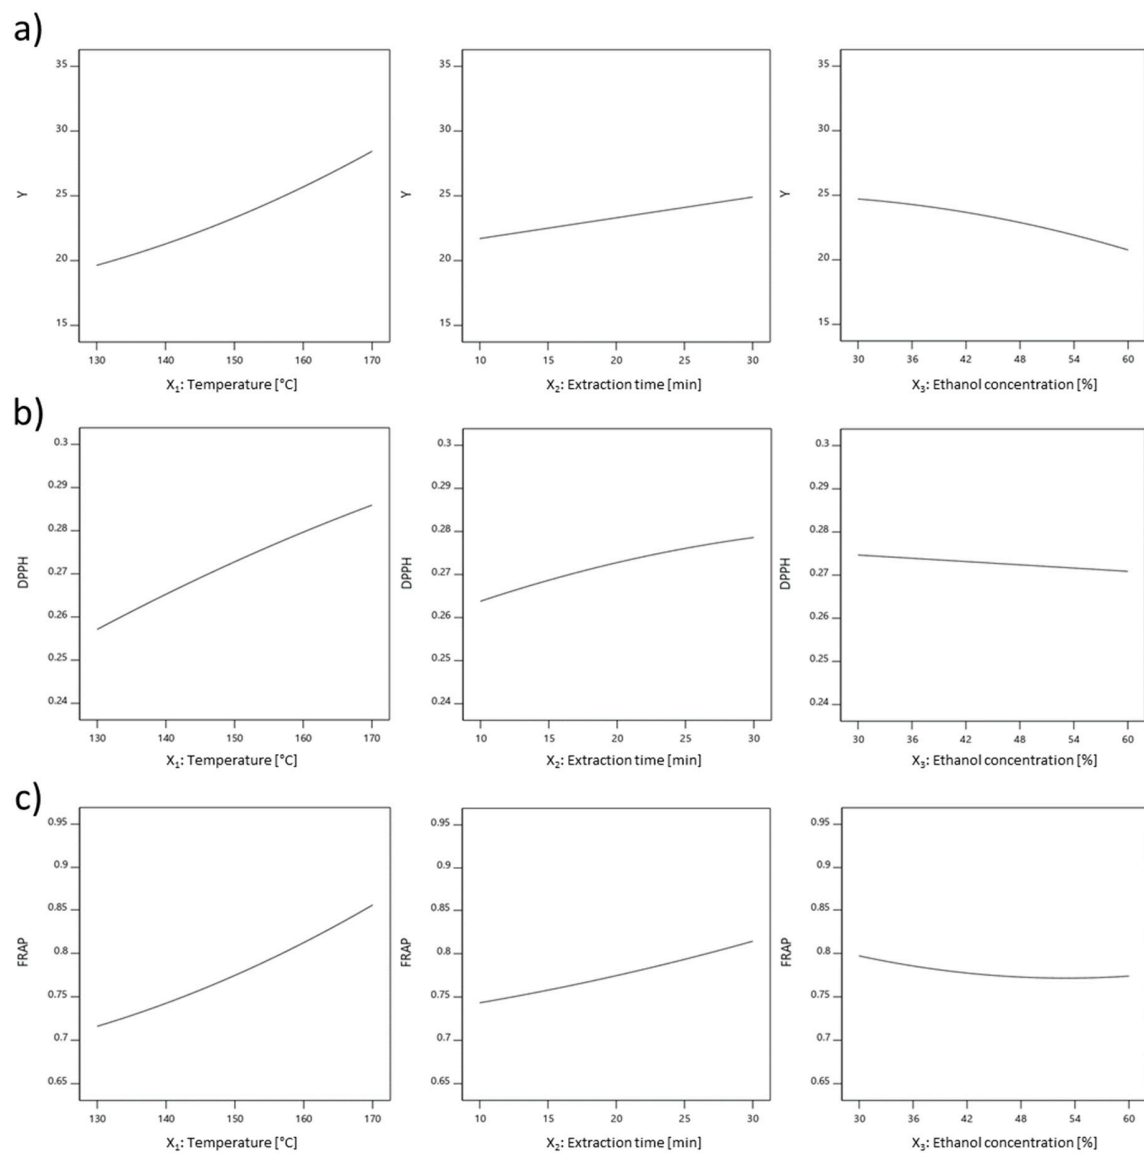

**Figure S5.** Effects of temperature, extraction time and ethanol concentration on a) Y, b) DPPH and c) FRAP

**Table S1.** Significance of linear, cross product and quadratic terms on Y, TP, DPPH, FRAP and ABTS.

| <b>Coefficients</b>                   | <b>Y</b>  | <b>TP</b> | <b>DPPH</b>     | <b>FRAP</b> | <b>ABTS</b> |
|---------------------------------------|-----------|-----------|-----------------|-------------|-------------|
|                                       |           |           | <i>p</i> -value |             |             |
| <i>Linear</i>                         |           |           |                 |             |             |
| X <sub>1</sub> -Temperature           | <0.0001 * | <0.0001 * | <0.0001 *       | 0.0001 *    | <0.0001 *   |
| X <sub>2</sub> -Extraction time       | <0.0001 * | 0.0019 *  | 0.0035 *        | 0.0102 **   | 0.0539      |
| X <sub>3</sub> -Ethanol concentration | <0.0001 * | 0.3289    | 0.3728          | 0.3249      | 0.1198      |
| <i>Cross product</i>                  |           |           |                 |             |             |
| X <sub>1</sub> X <sub>2</sub>         | 0.0074 *  | -         | 0.6025          | 0.2181      | 0.3366      |
| X <sub>1</sub> X <sub>3</sub>         | 0.0224 ** | 0.5095    | 0.3822          | 0.1957      | -           |
| X <sub>2</sub> X <sub>3</sub>         | -         | -         | -               | 0.3691      | 0.1840      |
| <i>Quadratic</i>                      |           |           |                 |             |             |
| X <sub>1</sub> <sup>2</sup>           | 0.0086 *  | 0.2149    | 0.7356          | 0.6131      | -           |
| X <sub>2</sub> <sup>2</sup>           | -         | 0.0377 ** | 0.6720          | 0.8480      | 0.3092      |
| X <sub>3</sub> <sup>2</sup>           | 0.0326 ** | 0.0608    | -               | 0.6226      | 0.1342      |

\* $p < 0.01$  – significant

\*\* $0.01 < p < 0.05$  – moderately significant
